# Supplementary material for: Minimum 2-Year Experience with Magnetically Controlled Growing Rods for the Treatment of Early-Onset Scoliosis: A Systematic Review
Source: PubMed Central journal article supplement — Asian Spine J. 2019 Mar 26;13(4):682–93. doi: 10.31616/asj.2018.0272 (PMC6680029; doi:10.31616/asj.2018.0272), 2019-03-26
Supplement: asj-2018-0272-suppl4.pdf [file asj-2018-0272-suppl4.pdf]

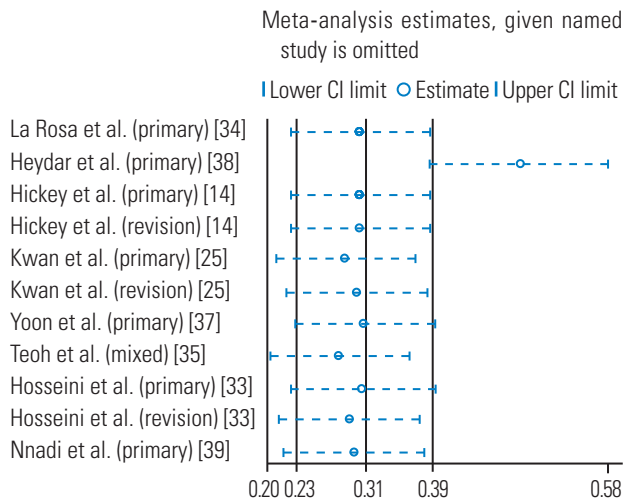

**Supplementary Fig. 1.** Sensitivity analysis indicating that the category of Heydar et al. (primary) [38] significantly contributed to the heterogeneity of complication rate. CI, confidence interval.

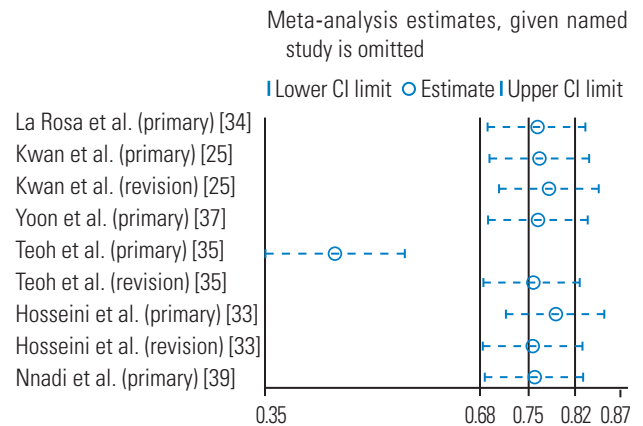

**Supplementary Fig. 2.** Sensitivity analysis indicating that the category of Teoh et al. (primary) [35] significantly contributed to the heterogeneity of rate of unplanned reoperations. CI, confidence interval.
